# Supplementary material for: MicroRNA-9-5p-CDX2 Axis: A Useful Prognostic Biomarker for Patients with Stage II/III Colorectal Cancer
Source: PubMed Central journal article supplement (PMC6966658; doi:10.3390/cancers11121891), 2019-11-27
Supplement: cancers-11-01891-s001.pdf [file cancers-11-01891-s001.pdf]

1 *Supplementary Materials*

2 **MicroRNA-9-5p-CDX2 Axis: A Useful Prognostic**  
 3 **Biomarker for Patients with Stage II/III Colorectal**  
 4 **Cancer**

5 Aya Nishiuchi <sup>1</sup>, Shigeo Hisamori <sup>1,\*</sup>, Masazumi Sakaguchi <sup>1,2</sup>, Keita Fukuyama <sup>3</sup>, Nobuaki  
 6 Hoshino <sup>1</sup>, Yoshiro Itatani <sup>1</sup>, Shusaku Honma <sup>1</sup>, Hisatsugu Maekawa <sup>1</sup>, Tatsuto Nishigori <sup>1</sup>,  
 7 Shigeru Tsunoda <sup>1</sup>, Kazutaka Obama <sup>1</sup>, Hiroyuki Miyoshi <sup>4</sup>, Yohei Shimono <sup>5</sup>, M. Mark Taketo <sup>6</sup>  
 8 and Yoshiharu Sakai <sup>1</sup>

9 **Supplementary Figures**

Figure S1

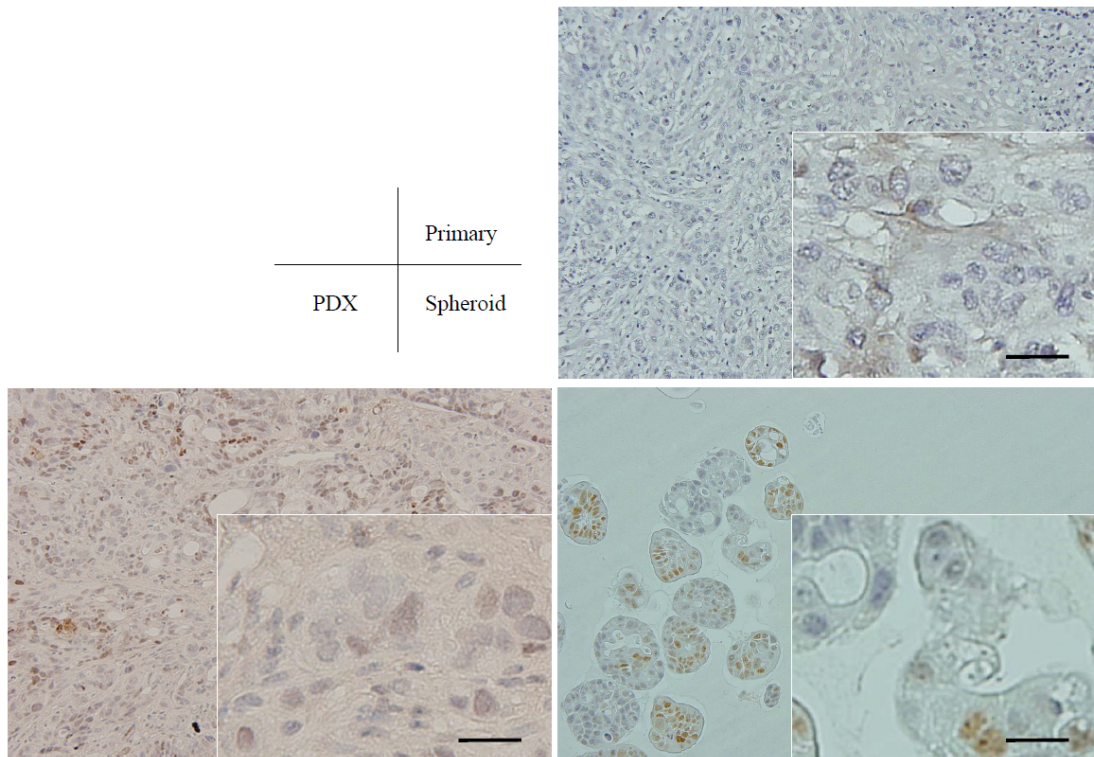

10  
 11  
 12

**Figure S1.** Similar staining pattern of CDX2 in primary tumor, PDX and spheroid by IHC examination. The scale bar represents 100  $\mu$ m.

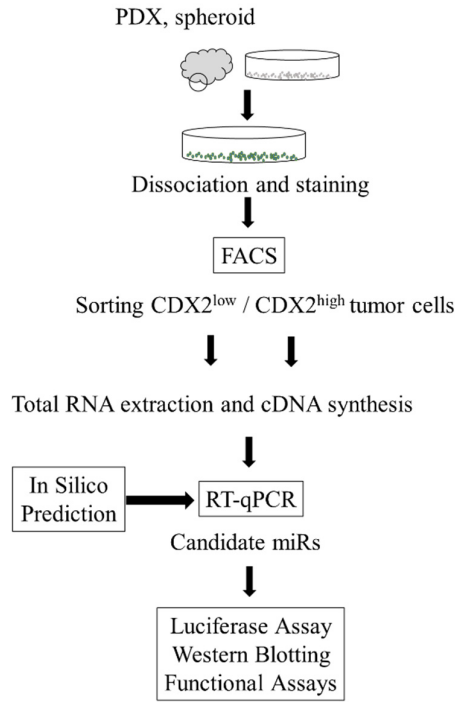

13

14

**Figure S2.** Schematic workflow to identify the miR that regulates the expression of CDX2.
